# Supplementary material for: GLM-based optimization of NGS data analysis: A case study of Roche 454, Ion Torrent PGM and Illumina NextSeq sequencing data
Source: PLOS journal article supplement (doi:10.1371/journal.pone.0171983), 2017-02-21
Supplement: S18 (10.1371/journal.pone.0171983.s018) [file journal.pone.0171983.s018]

Table 1: Base pairs (bp) in the target region, in exons in the target region and number of genes covered by 454, Ion Torrent and Illumina.

| Sequencer   | Target region (total) | Target region (exon) | Genes |
|-------------|-----------------------|----------------------|-------|
| 454         | 40,629 bp             | 24,931 bp            | 20    |
| Ion Torrent | 47,588 bp             | 25,536 bp            | 20    |
| Illumina    | 108,329 bp            | 71,803 bp            | 54    |
| Overlap     | 28,775 bp             | 22,062 bp            | 19    |
